# Supplementary material
Source: PubMed Central journal article supplement (PMC7308169)
Supplement: EMS85893-supplement-SIGuide.pdf [file EMS85893-supplement-SIGuide.pdf]

**Supplementary information for:  
The Molecular Architecture of the Gram Positive Bacterial Cell Wall**

L. Pasquina-Lemonche<sup>1,2,3y</sup>, J. Burns<sup>1,2,3y</sup>, R.D. Turner<sup>1,4,5</sup>, S. Kumar<sup>1,2,6</sup>, R. Tank<sup>1,2</sup>, N. Mullin<sup>1,2</sup>, J.S. Wilson<sup>1,4</sup>, B. Chakrabarti<sup>2</sup>, P.A. Bullough<sup>1,4</sup>, S.J. Foster<sup>1,3,4\*</sup>, J.K. Hobbs<sup>1,2,3\*</sup>

<sup>1</sup> *Krebs Institute, University of Sheffield. S10 2TN. UK*

<sup>2</sup> *Dept. Physics and Astronomy, University of Sheffield. S3 7RH. UK*

<sup>3</sup> *The Florey Institute, University of Sheffield. S10 2TN. UK*

<sup>4</sup> *Dept. Molecular Biology and Biotechnology, University of Sheffield. S10 2TN. UK*

<sup>5</sup> *Current address: Department of Computer Science, University of Sheffield. S1 4DP. UK*

<sup>6</sup> *Current address: Dept. of Biochemistry, University of Oxford. OX1 3QU*

**CONTENTS**

Supplementary information 1: Video showing a tomogram of a purified frozen hydrated *S. aureus* sacculus.

Supplementary information 2: MATLAB code for obtaining peptidoglycan strand orientation.

Supplementary information 3: Estimation of the critical pore size to maintain plasma membrane integrity.
