# Supplementary material
Source: PubMed Central journal article supplement (PMC7308169)
Supplement: EMS85893-supplement-SuppInfo.pdf [file EMS85893-supplement-SuppInfo.pdf]

### **Supplementary information 1**

#### **Video showing a tomogram of a purified frozen hydrated *S. aureus* sacculus.**

(Seconds 0 to 4) The video "Video\_SI1.mp4" shows the tomogram from the bottom to the top. There is a first stopping point which corresponds to where image ED6b was extracted from and then a second stopping point which corresponding to ED6a.

Each slice shown on the tomogram correspond to 1.3 nm. Images ED6a-d correspond to 10 slices thick, which means they represent 13 nm of the tomogram.

(Seconds 4 to 7) Later on in the video, the slices are shown from top to bottom, with an isosurface (in green) manually drawn showing the outline of the sacculus.

## Supplementary information 2

### MATLAB code for determining glycan strand orientation

```
% read the image into MATLAB and convert it to grayscale

I = imread('image_name.jpg'); %enter name of file within ' '
Igray = rgb2gray(I);
figure, imshow(I);

% We will clean it up with a few morphological operations
Ibw = im2bw(Igray, graythresh(Igray));
se = strel('line',3,200);
cleanI = imdilate(~Ibw,se);
figure, imshow(cleanI);

% Perform a Hough Transform on the image The Hough Transform identifies
lines in an image
[H,theta,rho] = hough(cleanI);
P = houghpeaks(H,300,'threshold',ceil(0.5*max(H(:))))); %find peaks with a
threshold of minimum signal to be considered a peak

%the houghlines function defines how to draw the lines. Variable parameters
are: Fill Gap (defines minimum space between two lines). Min Length defines
the minimumsize of a marked line. The numbers were optimized using the set
of images available.
lines = houghlines(cleanI,theta,rho,P,'FillGap',3,'MinLength',15);

%Plot the lines on top of image marking the beginning and end
hold on
max_len = 0;
for k = 1:length(lines)
    xy = [lines(k).point1; lines(k).point2];
    plot(xy(:,1),xy(:,2),'LineWidth',2,'Color','green','LineStyle','-');

    % Determine the endpoints of the longest line segment
    len = norm(lines(k).point1 - lines(k).point2);
    if ( len > max_len)
        max_len = len;
        xy_long = xy;
    end
end
hold off

%To be able to plot the angles using the rose function, it is necessary to
transform all the degree values of theta to radians using deg2rad.
hold on
for k = 1:length(lines)
    lines(k).theta = - deg2rad(lines(k).theta);
end
hold off

%plotting the results (angles between 0-180)
figure;rose([lines.theta]);
```

MATLAB code used to automatically detect lines that were manually drawn on top of the images. The drawing had to follow certain rules for the program to work: it only detects straight lines, they must be of approximately similar length and width. A Windows laptop/tablet was used to draw on top of each image following these guidelines. Then, the Hough transformation creates a matrix where for each beginning and end of a line, it associates a vector to it and an orientation angle. The function 'rose' at the end of the code produces the rose diagrams representing the angle distribution of the vector lines.  $\theta$ , it plots the different angles with respect to the reference being the vertical axis of the image set to 0 degrees. This process was repeated for all the images analysed without altering any parameter, to produce the angle distribution for each image.

### Supplementary information 3

#### Estimation of the critical pore size to maintain plasma membrane integrity.

Our calculation is rooted in the elastic deformation energy of a membrane given by the Helfrich-Canham form<sup>1</sup>,

$$F_H = \frac{\kappa}{2} \int H^2 dA, \quad \text{eqn. 1}$$

where  $\kappa$  is the bending modulus of the membrane,  $H$ , the mean curvature, and  $dA$  the surface area element. We note that the spontaneous curvature of the membrane is assumed to be zero. Since the Gaussian curvature integrates to a constant term via the Gauss-Bonnet theorem for closed membranes the elastic deformation term corresponding to Gaussian curvature is neglected in Eq. 1. We visualize the cell membrane as a closed continuous sheet without any holes.

The mean curvature,  $H = \frac{1}{2}(c_1 + c_2)$  where  $c_1$  and  $c_2$  are the principal curvatures of the membrane. For a hemispherical bulge of radius  $R$  the Helfich-Canham free energy is given by

$$F_H = \pi\kappa. \quad \text{eqn. 2}$$

The work done to cause the membrane to deform into a hemispherical bulge will be given by  $P\Delta V$  where  $P$  here is the turgor pressure of the cell and  $\Delta V$  is the volume associated with the bulge. This gives a critical pressure to form the hemispherical bulge of

$$P_{crit} = \frac{3\kappa}{2R^3}. \quad \text{eqn. 3}$$

At pressures above this we expect the membrane would start to escape out through the hole, ultimately leading to cell death. i.e.  $P_{crit}$  here is the maximum turgor pressure that the cell can sustain.

We calculate the expected maximum pore size for the expected cellular turgor pressure of approximately 20 bar.  $R$  is taken to be half the measured pore diameter. Values for the bending modulus of Gram positive cell membranes are hard to find in the literature. We estimate that  $\kappa$  is in the range 20-70  $k_B T$ , the lower bound being the bending modulus for a lipid membrane, in line with Daly *et al*<sup>2</sup> and the upper bound being the bending modulus for a eukaryotic cell membrane lacking anchoring to the actin cortex<sup>3</sup>. For a turgor pressure of 20 bar, this gives us an estimated critical pore diameter of 8-12 nm, implying that the pores seen are just small enough that membrane rigidity is able to maintain cell turgor.

#### References

1. Helfrich, W. "Elastic Properties of Lipid Bilayers Theory and Possible Experiments", Z. Naturforsch. C 28 693-703 (1973)
2. Daly, E.K., Huang, K.C., Wingreen, N.S., Muckhopadhyay, R. "Mechanics of membrane bulging during cell-wall disruption in Gram-negative bacteria" Phys. Rev. E **83**, 041922 (2011)
3. Simson, R., Wallraff, E., Faix, J., Niewöhner, J., Gerisch, G., Sackmann, E. "Membrane bending modulus and adhesion energy of wil-type and mutant cells of Dictyostelium lacking Talin or Cortexillins" Biophys. J. **74**, 514-522 (1998)
